# Supplementary material for: Apelin signaling drives vascular endothelial cells toward a pro-angiogenic state
Source: eLife journal article supplement (doi:10.7554/elife.55589), 2020-09-21
Supplement: supp [file elife-55589-supp-v1.zip]

Archive with 13 entries (13 files):
- elife_poa_e55589_Transparent_Reporting_File.pdf
- elife_poa_e55589_Figure_1_figure_supplement_1.pdf
- elife_poa_e55589_Figure_1_figure_supplement_2.pdf
- elife_poa_e55589_Figure_1_figure_supplement_3.pdf
- elife_poa_e55589_Figure_2_figure_supplement_1.pdf
- elife_poa_e55589_Figure_2_figure_supplement_2.pdf
- elife_poa_e55589_Figure_2_figure_supplement_3.pdf
- elife_poa_e55589_Figure_3_figure_supplement_1.pdf
- elife_poa_e55589_Figure_3_figure_supplement_2.pdf
- elife_poa_e55589_Figure_4_figure_supplement_1.pdf
- elife_poa_e55589_Figure_5_figure_supplement_1.pdf
- elife_poa_e55589_Video_1.mp4
- elife_poa_e55589_Video_2.mp4
