# Supplementary figures and images for: Apelin signaling drives vascular endothelial cells toward a pro-angiogenic state
Source: eLife journal article supplement (doi:10.7554/elife.55589), 2020-09-21

Figure 5-figure supplement 1

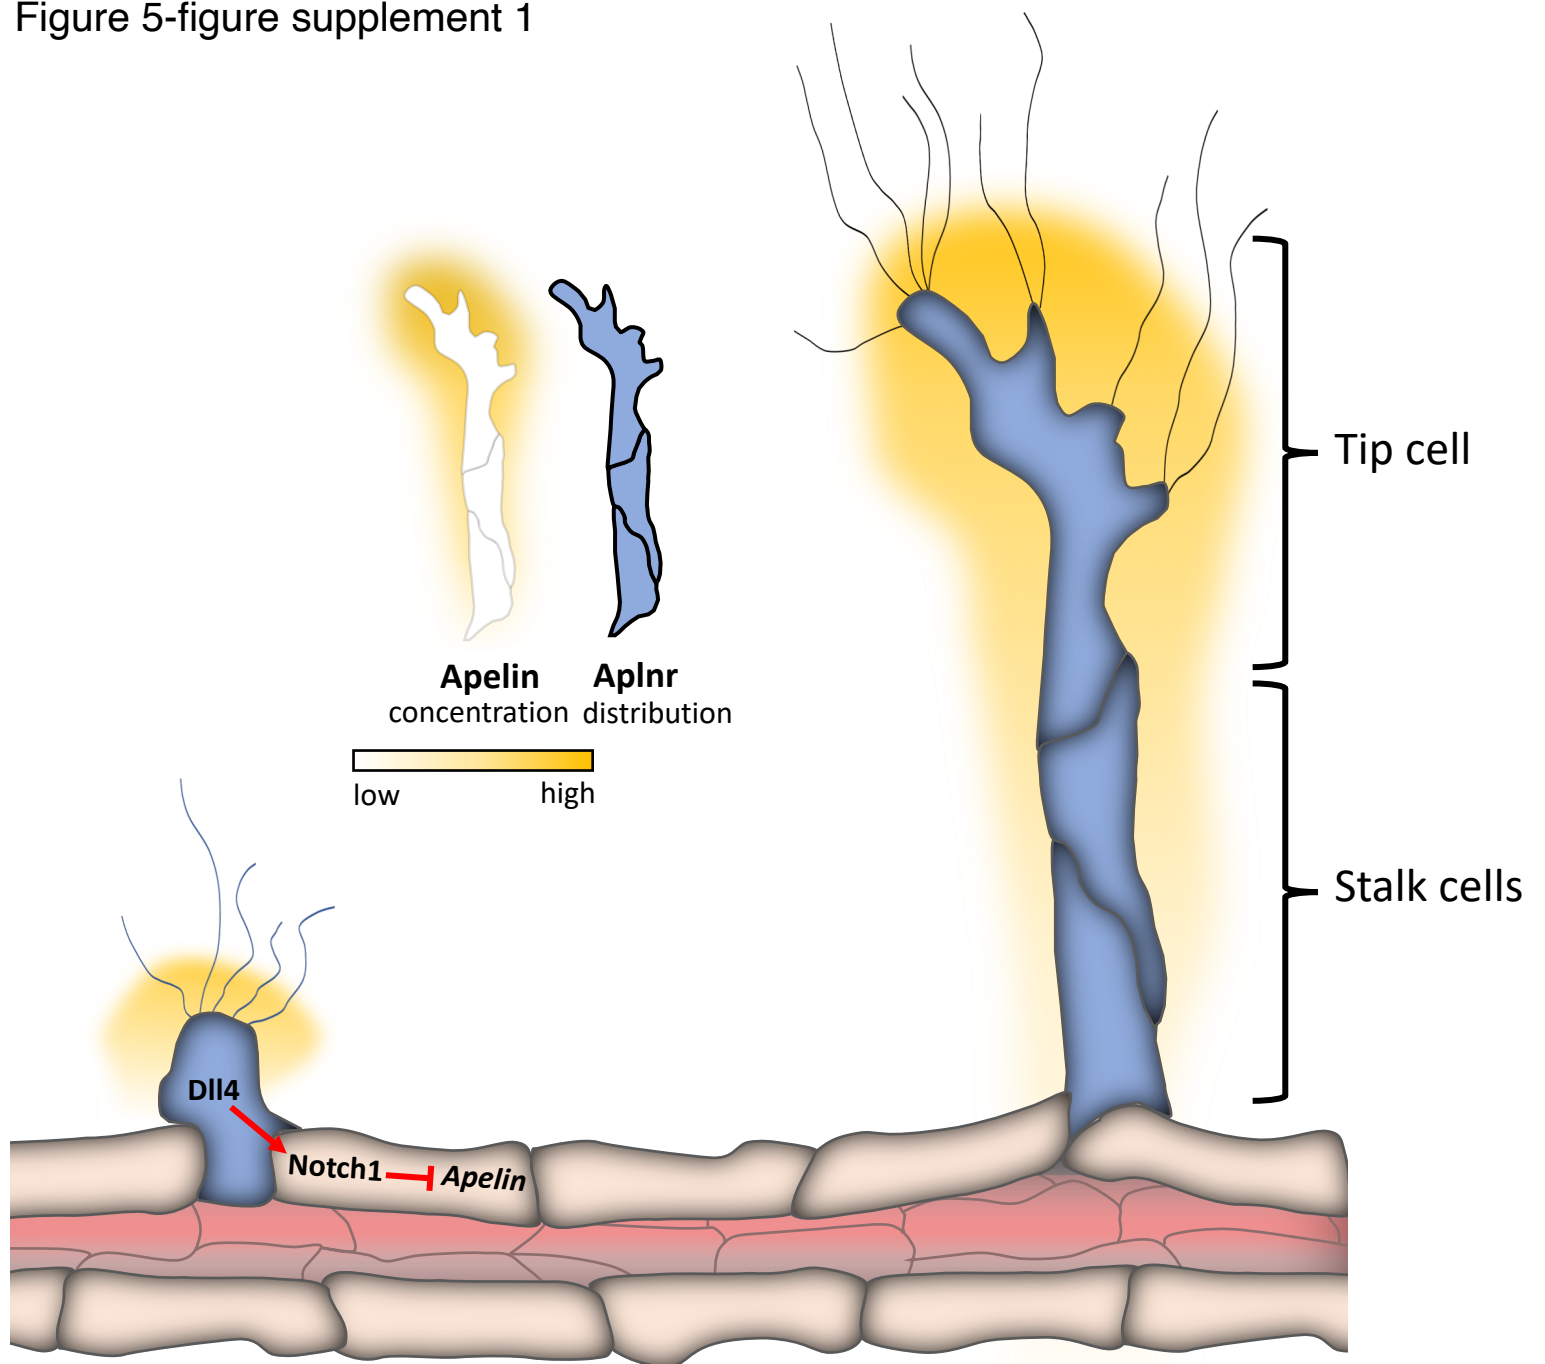

Supplement: supp [file elife-55589-supp-v1.zip]

Figure 2-figure supplement 1

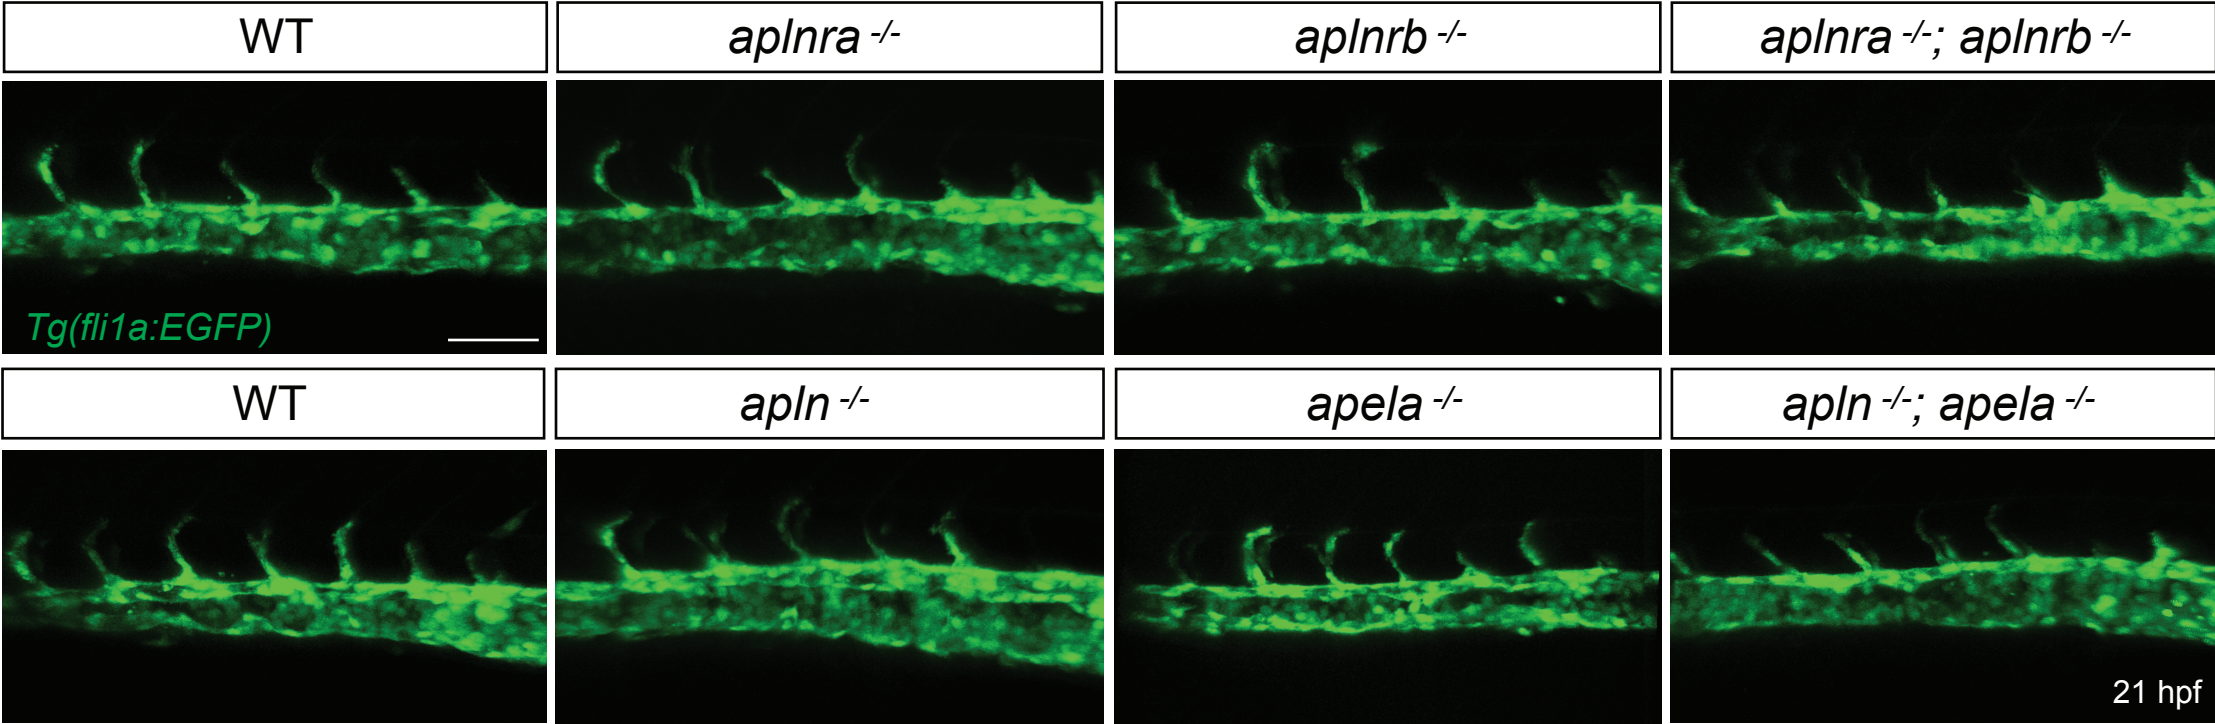

Supplement: supp [file elife-55589-supp-v1.zip]

Figure 1-figure supplement 3

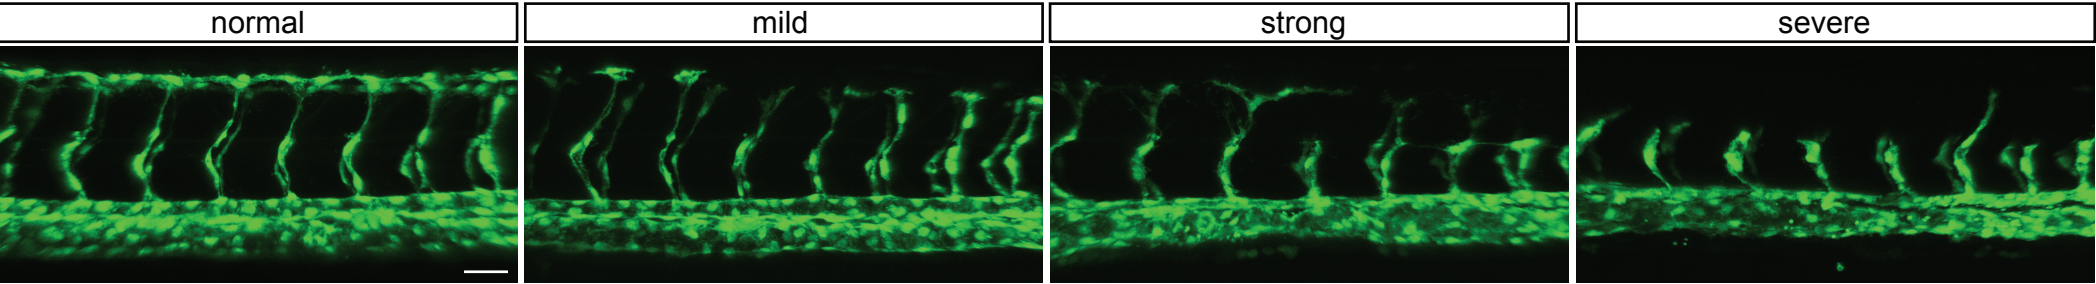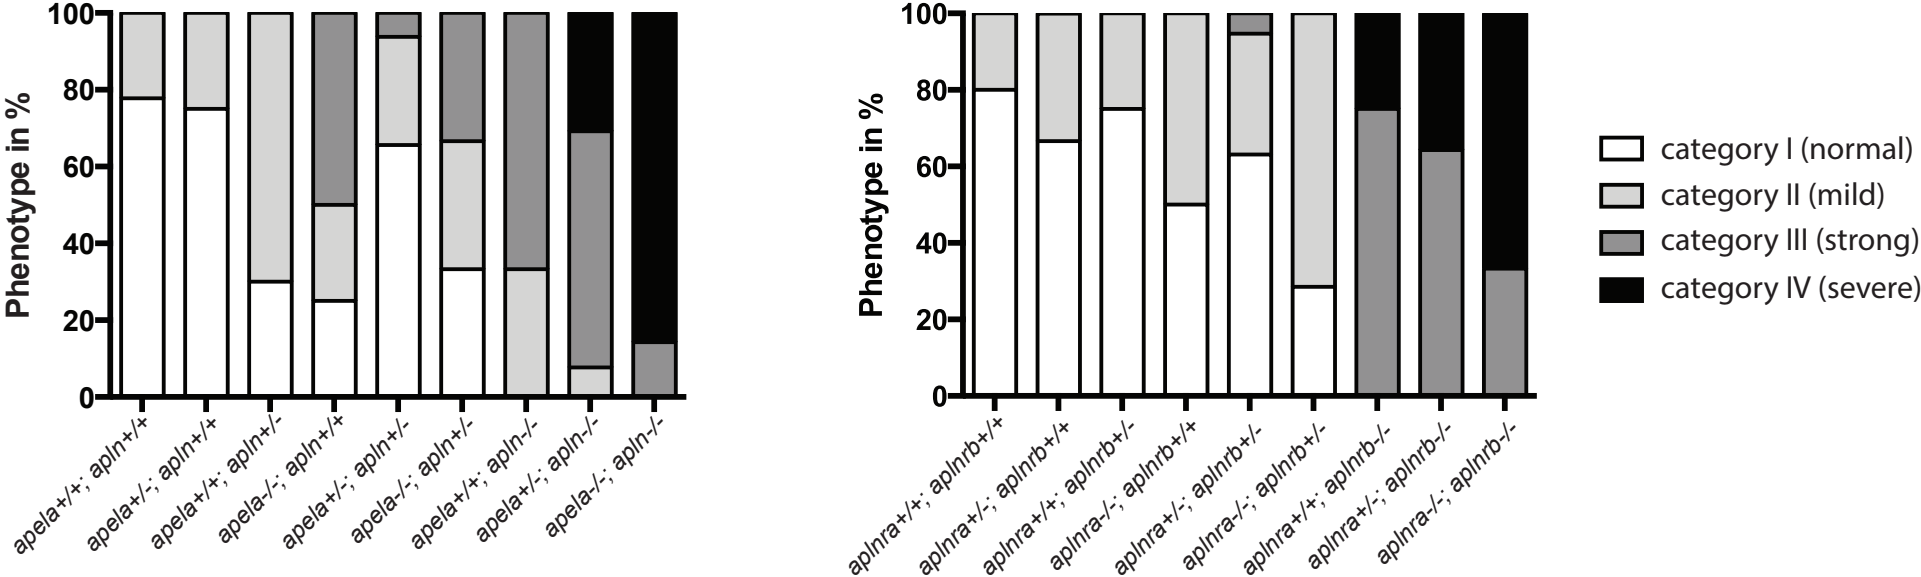

Supplement: supp [file elife-55589-supp-v1.zip]

Figure 1-figure supplement 2

*apln:EGFP*

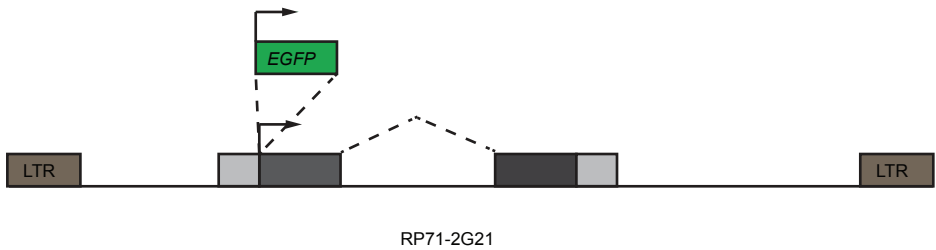

*aplnrb:aplnrb-TagRFP-sfGFP*

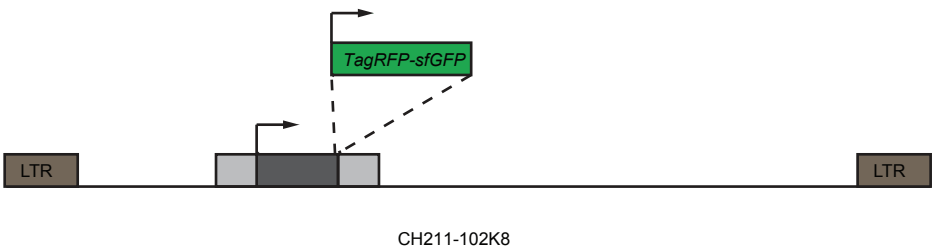

Supplement: supp [file elife-55589-supp-v1.zip]

Figure 2-figure supplement 3

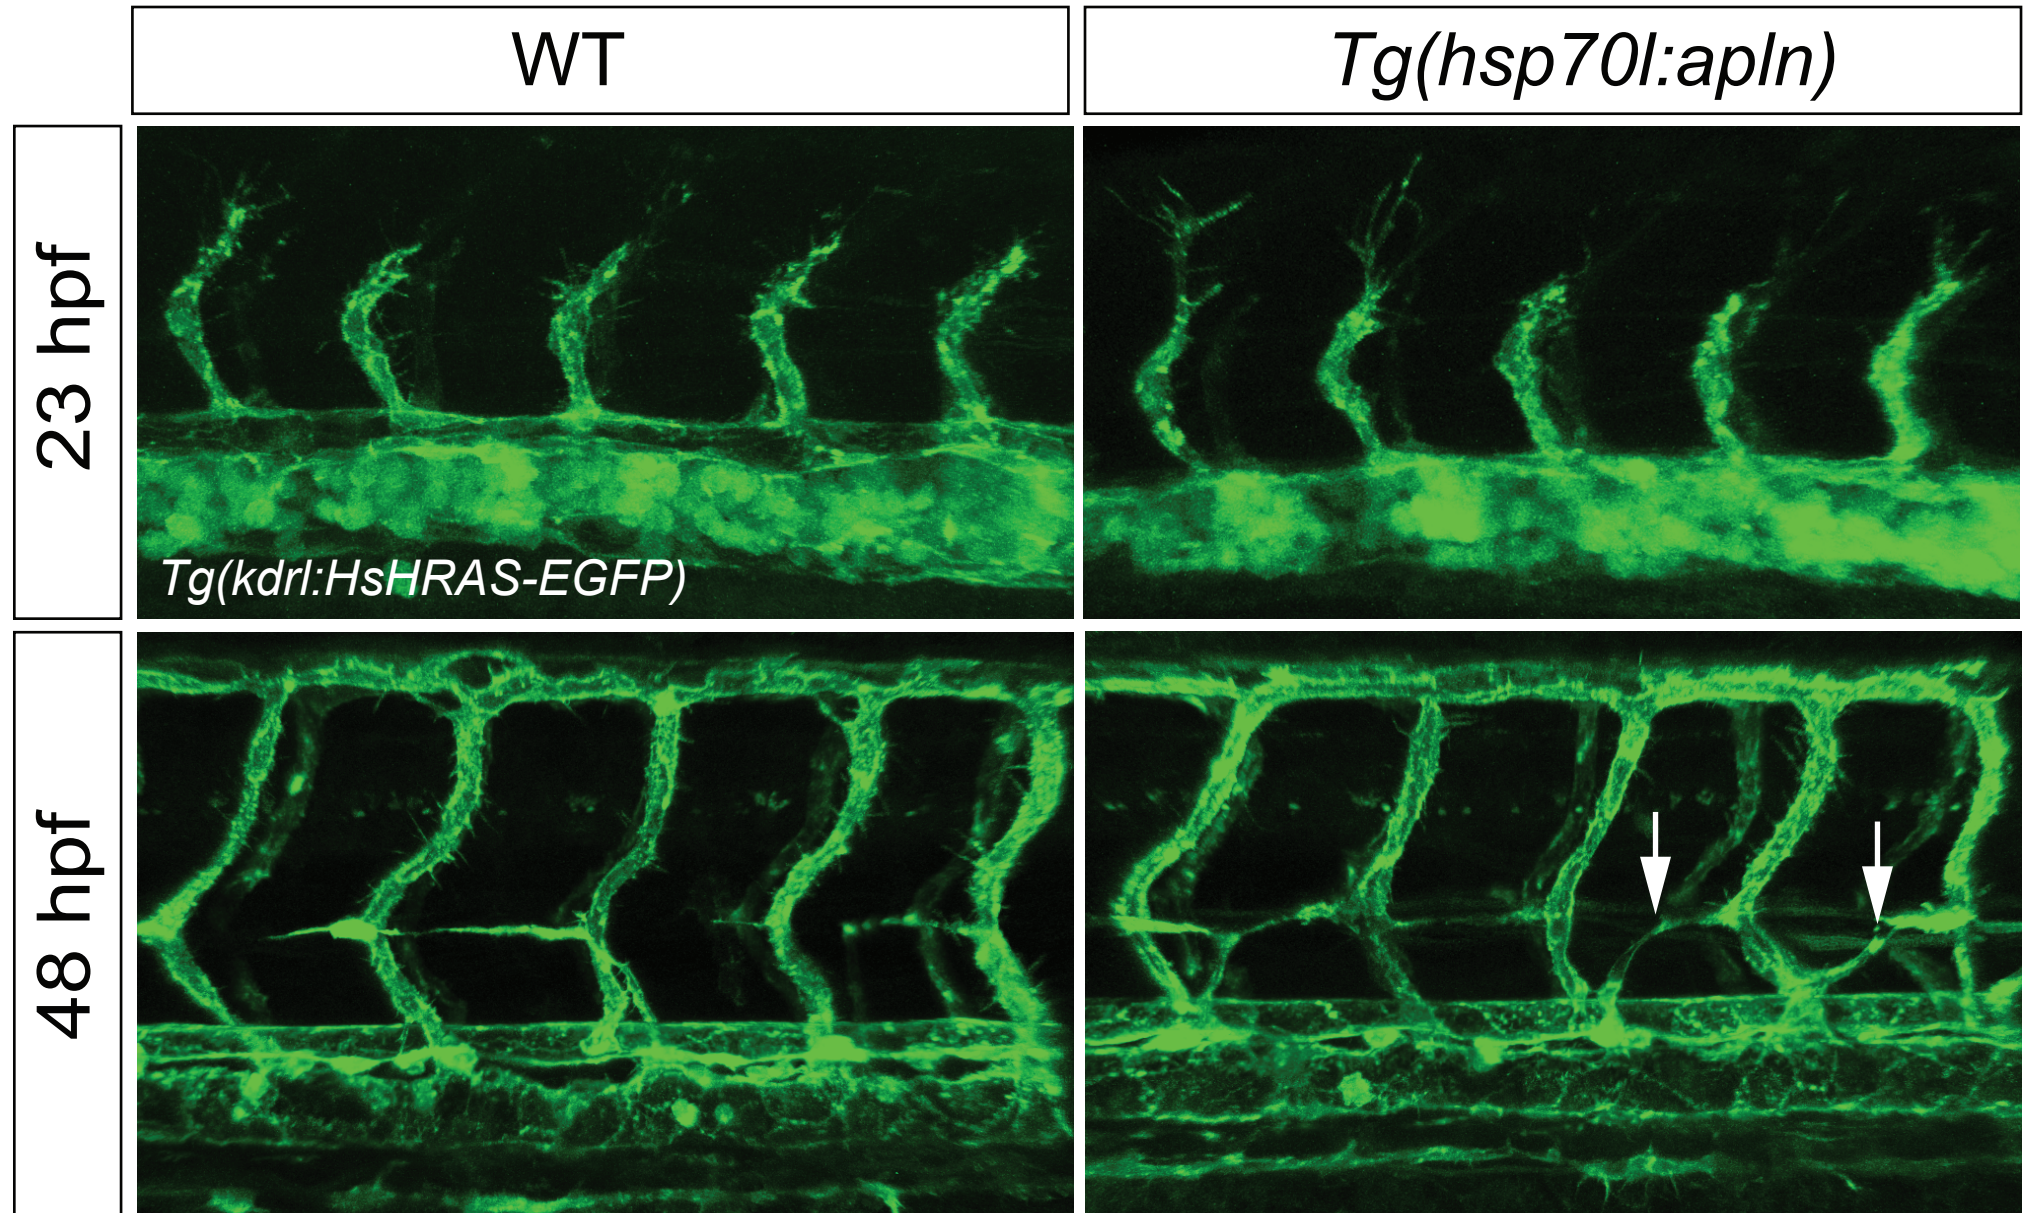

Supplement: supp [file elife-55589-supp-v1.zip]

Figure 3-figure supplement 1

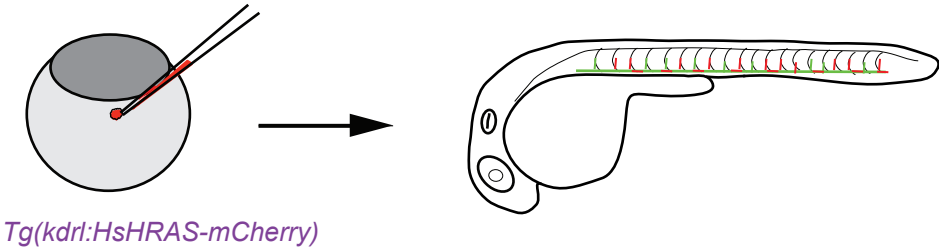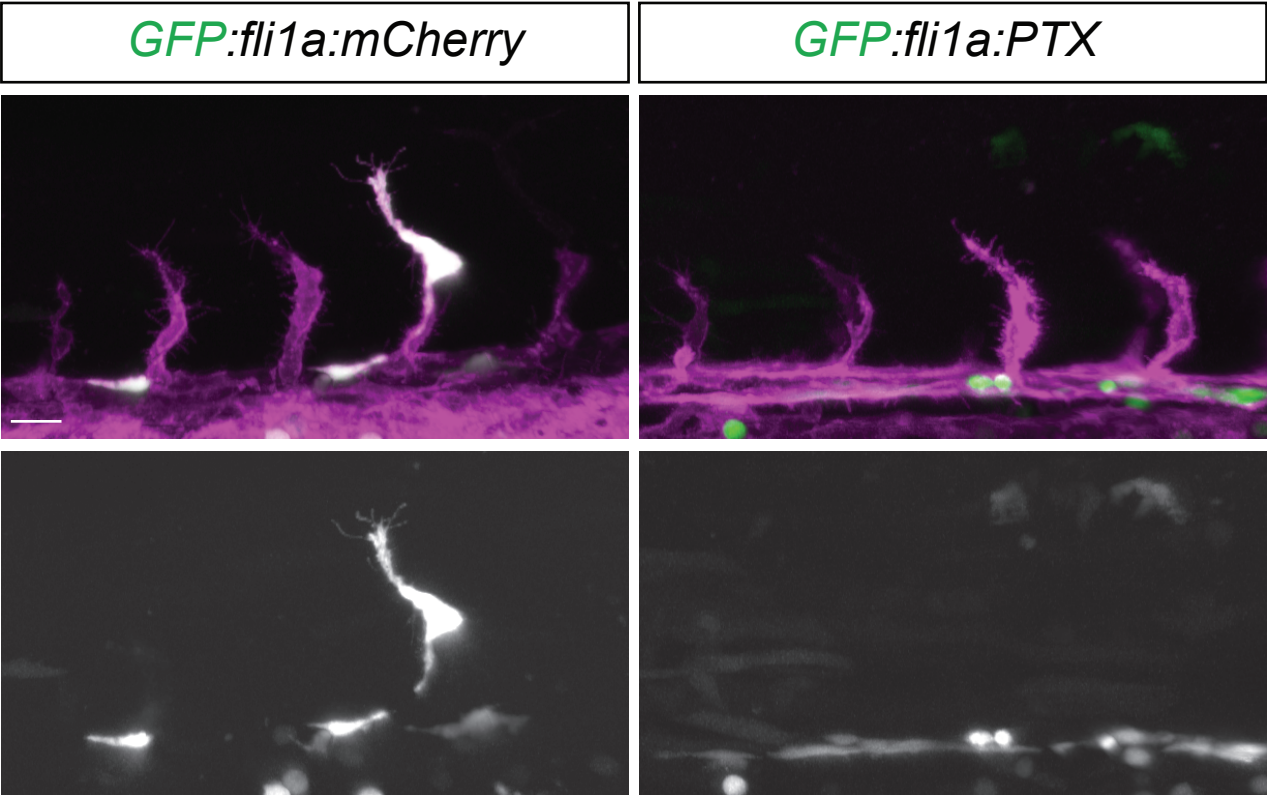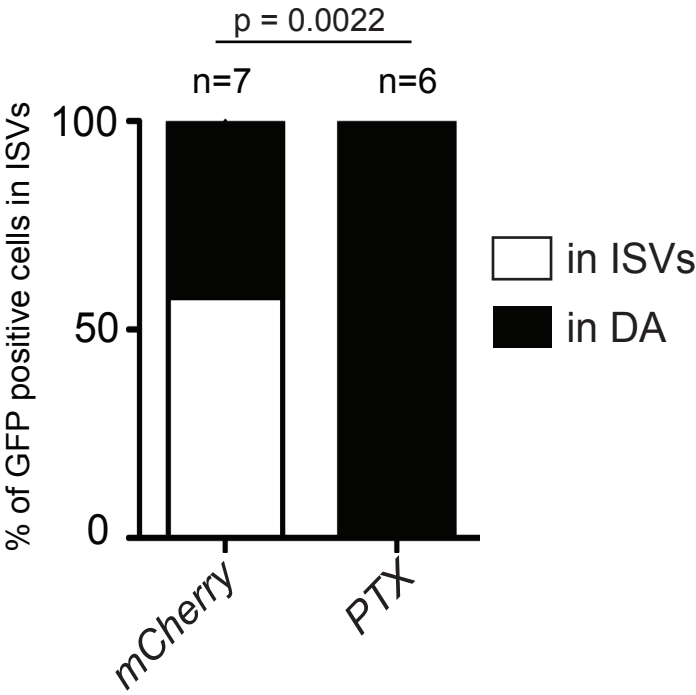

Supplement: supp [file elife-55589-supp-v1.zip]

Figure 2-figure supplement 2

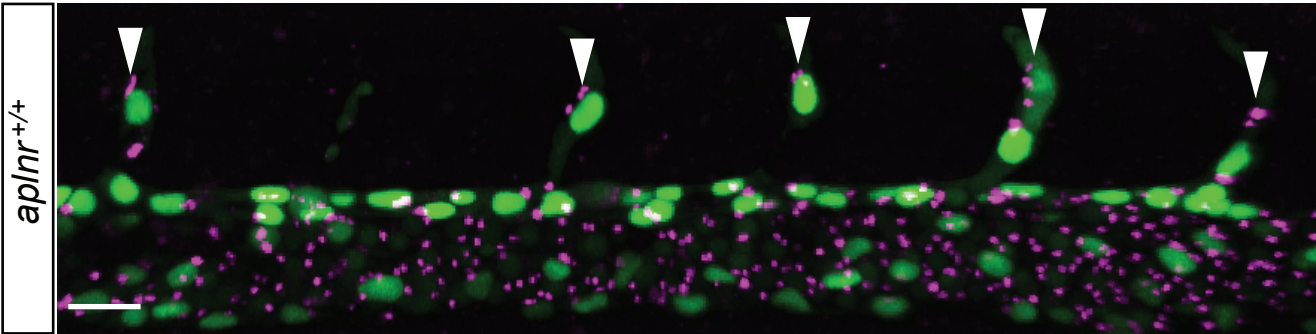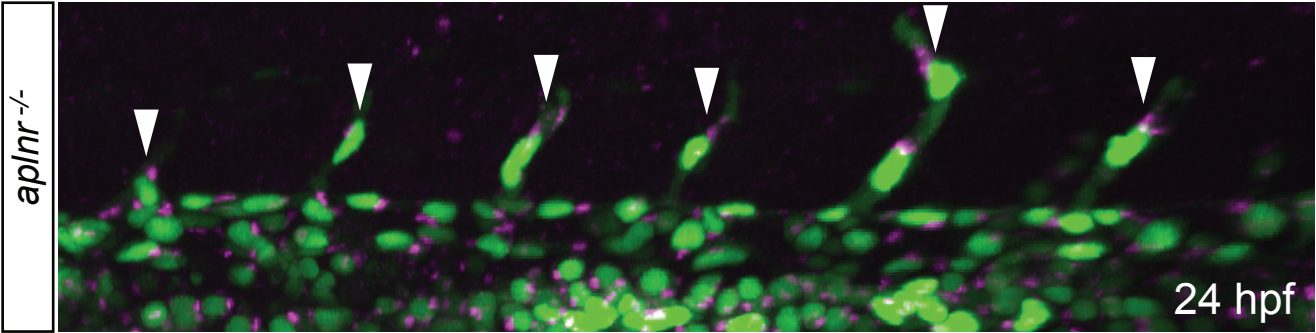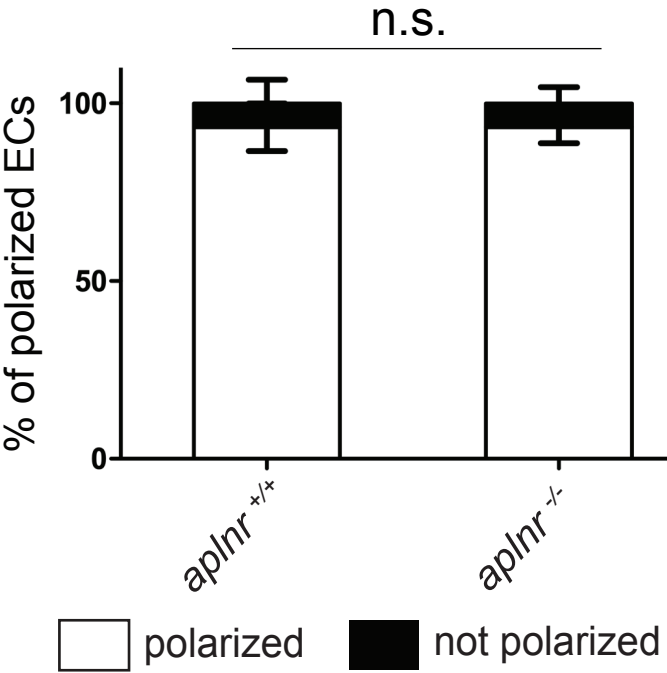

Supplement: supp [file elife-55589-supp-v1.zip]

Figure 1-figure supplement 1

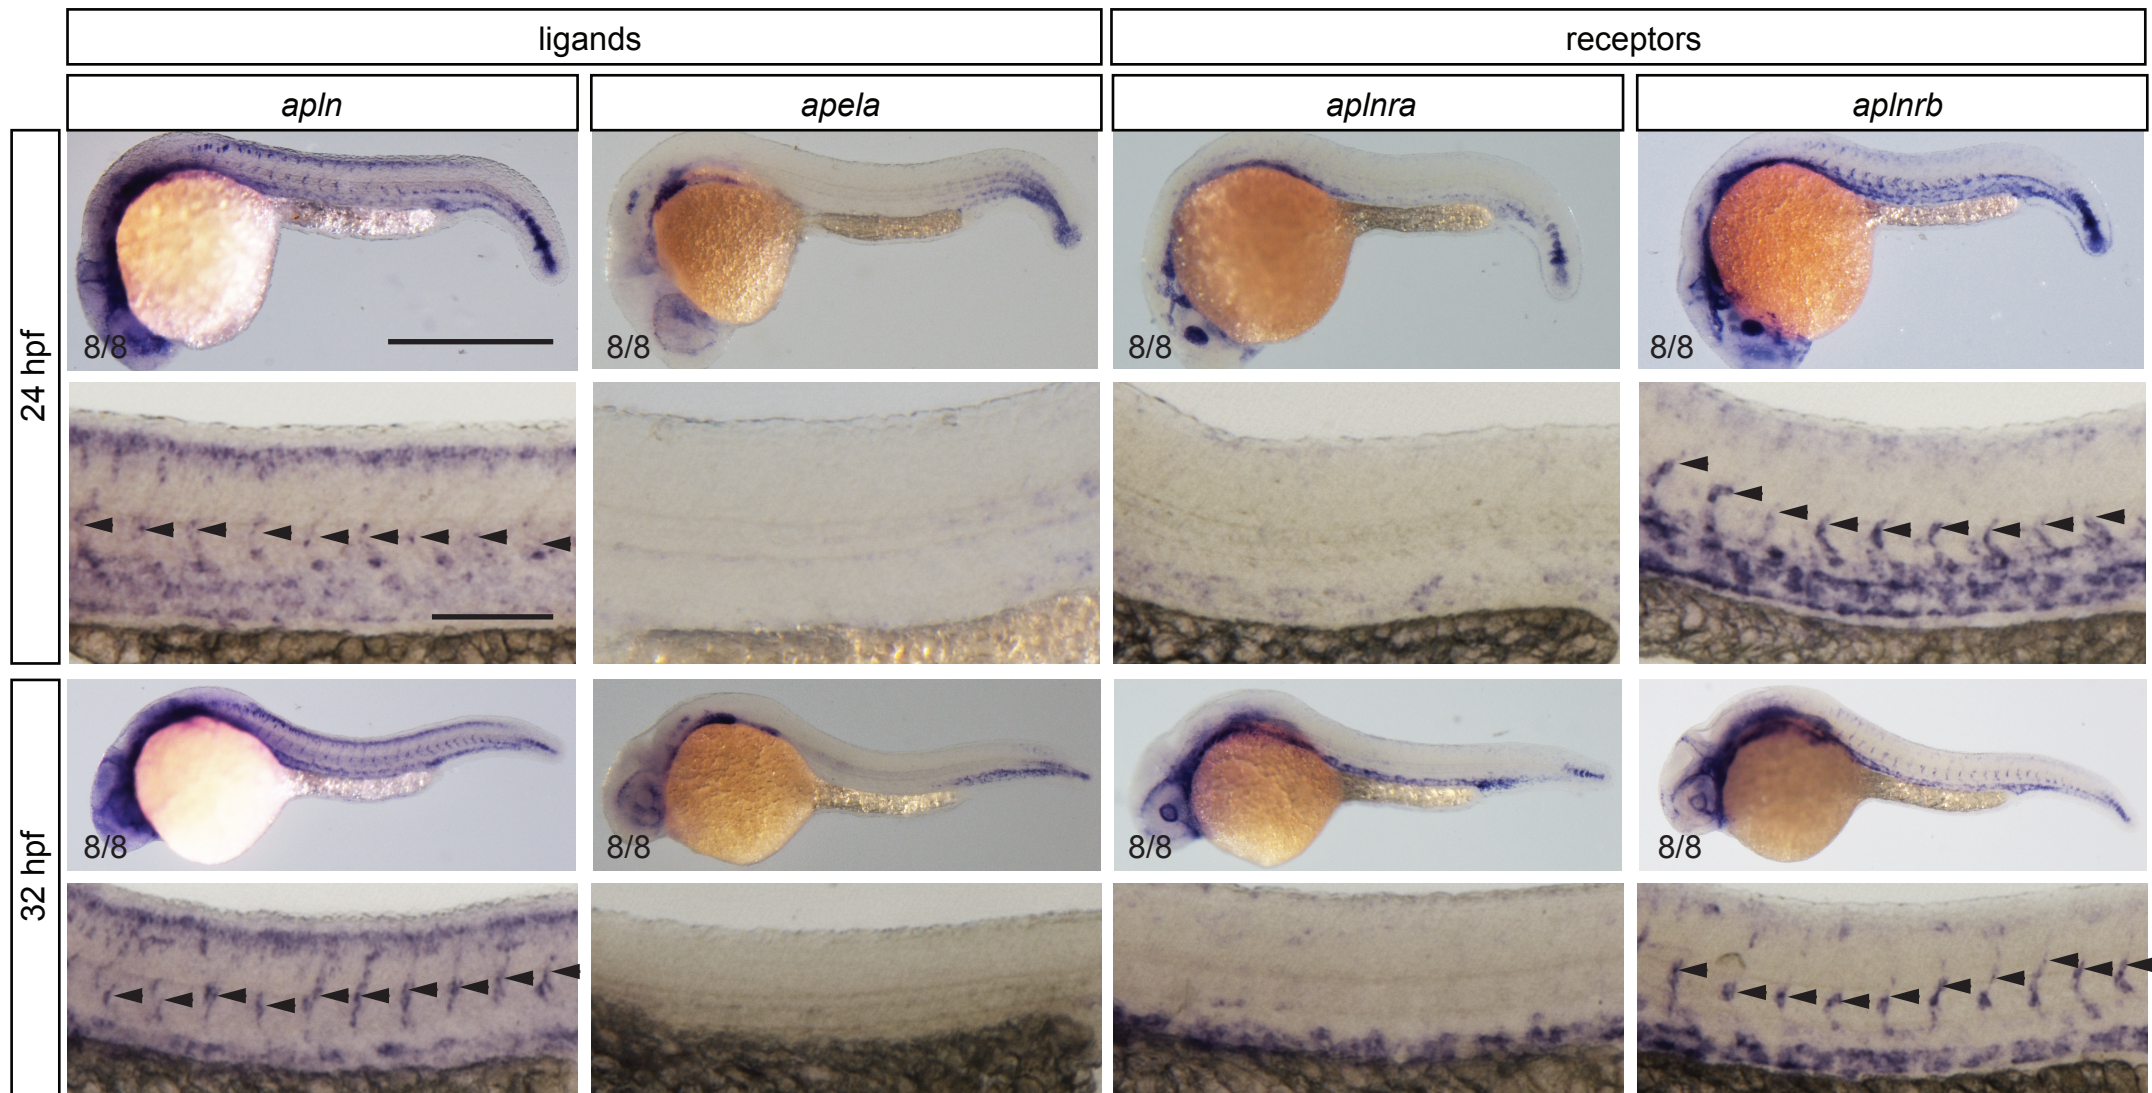

Supplement: supp [file elife-55589-supp-v1.zip › elife_poa_e55589_Figure_1_figure_supplement_1.pdf]

Figure 3-figure supplement 2

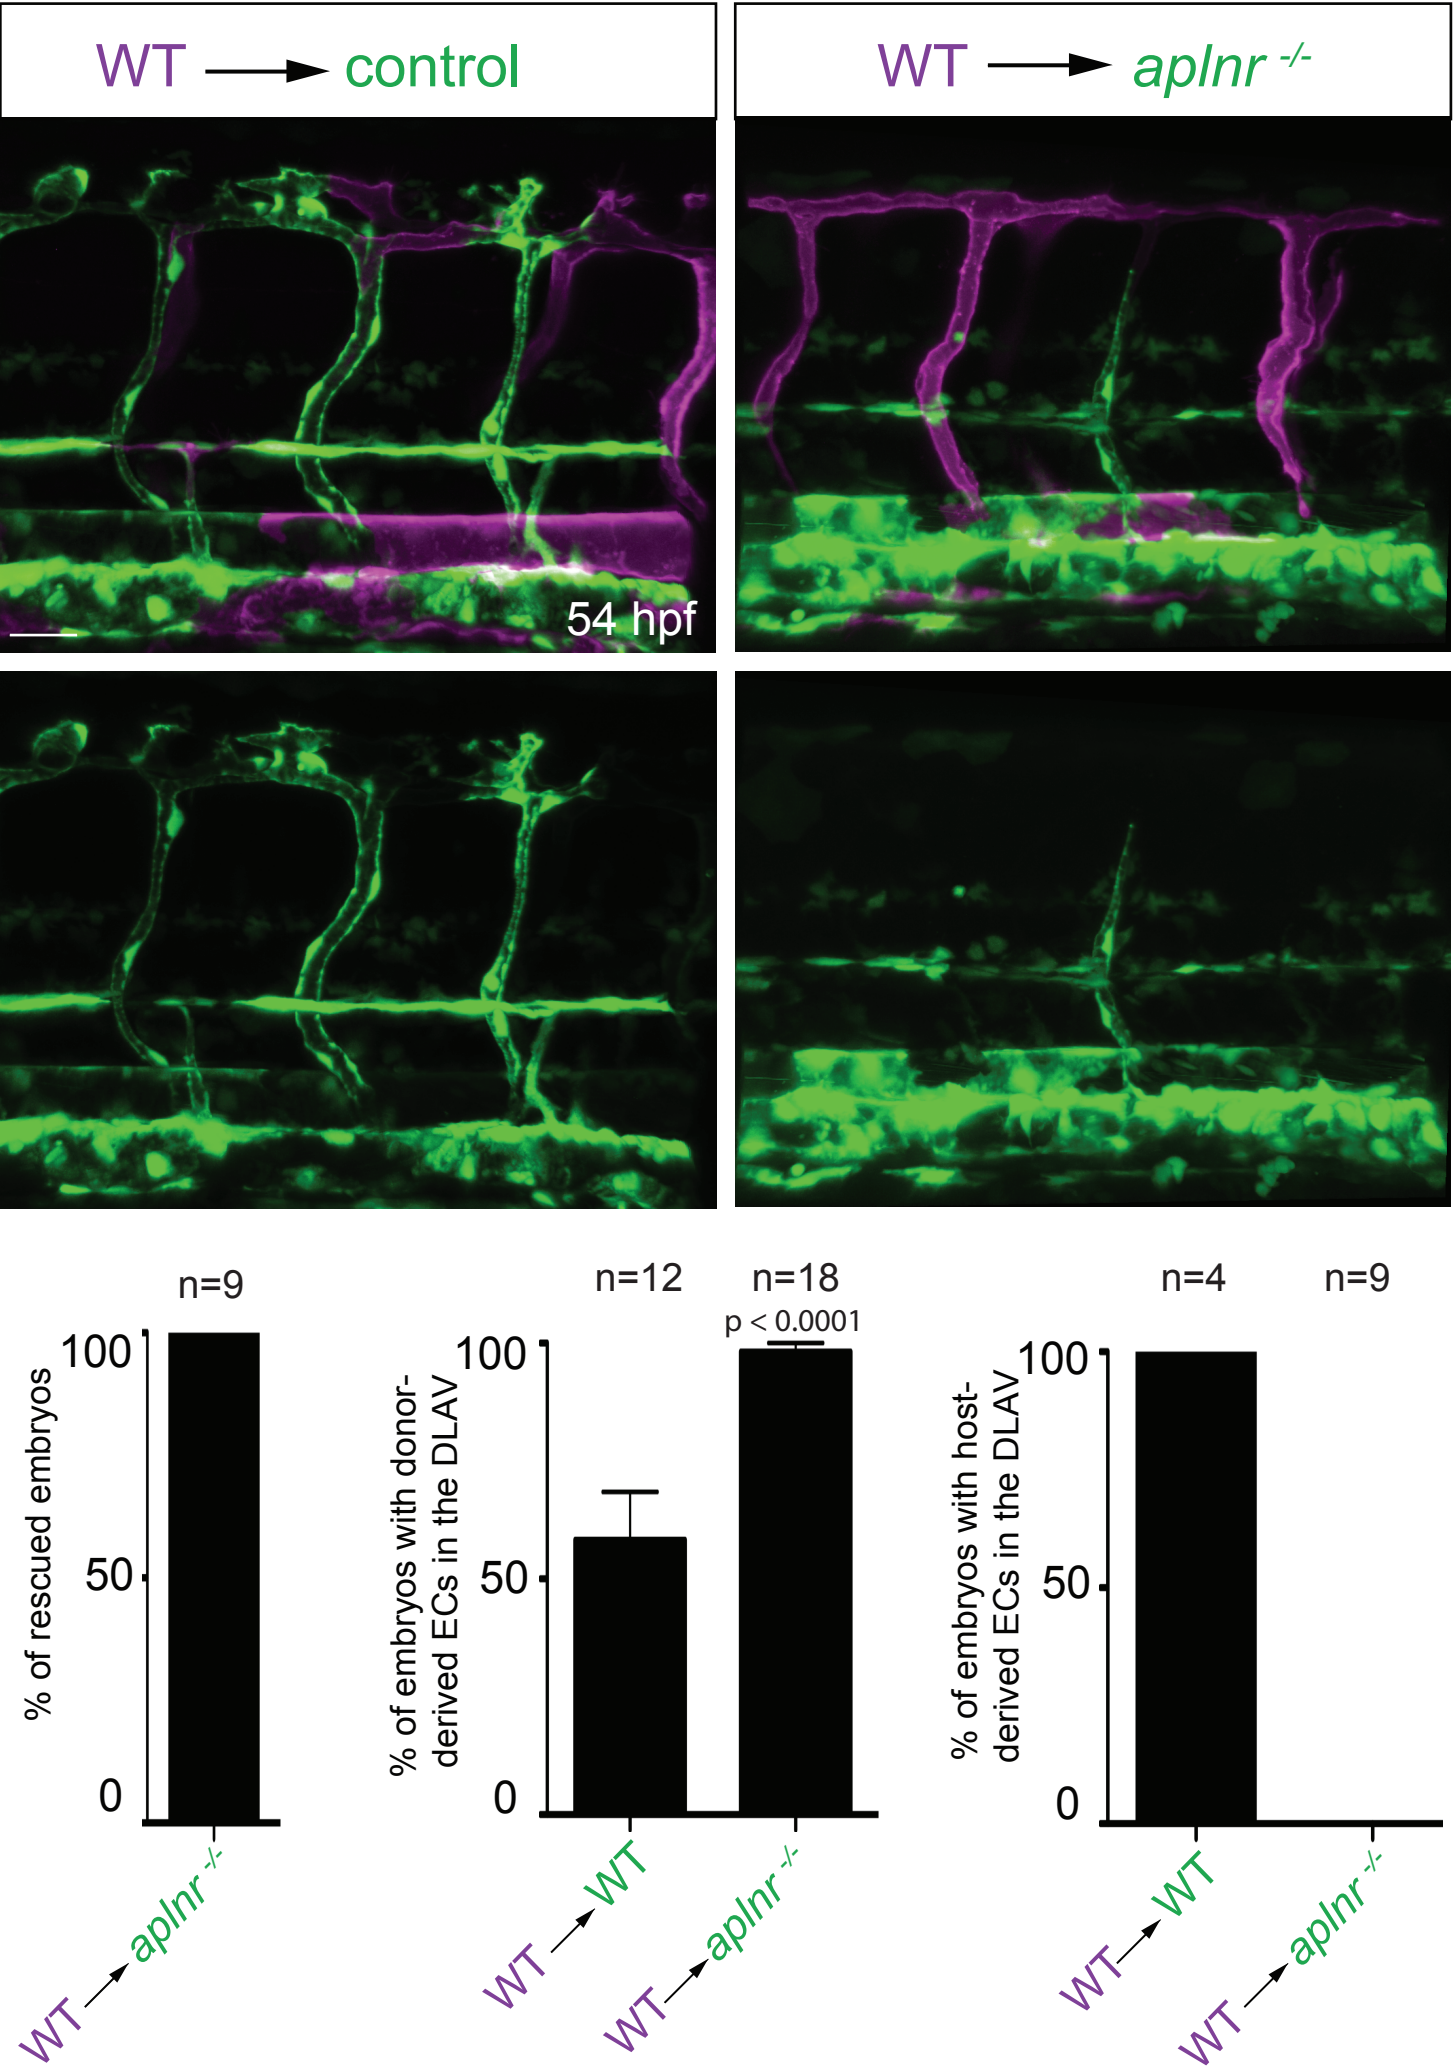

Supplement: supp [file elife-55589-supp-v1.zip › elife_poa_e55589_Figure_3_figure_supplement_2.pdf]

Figure 4-figure supplement 1

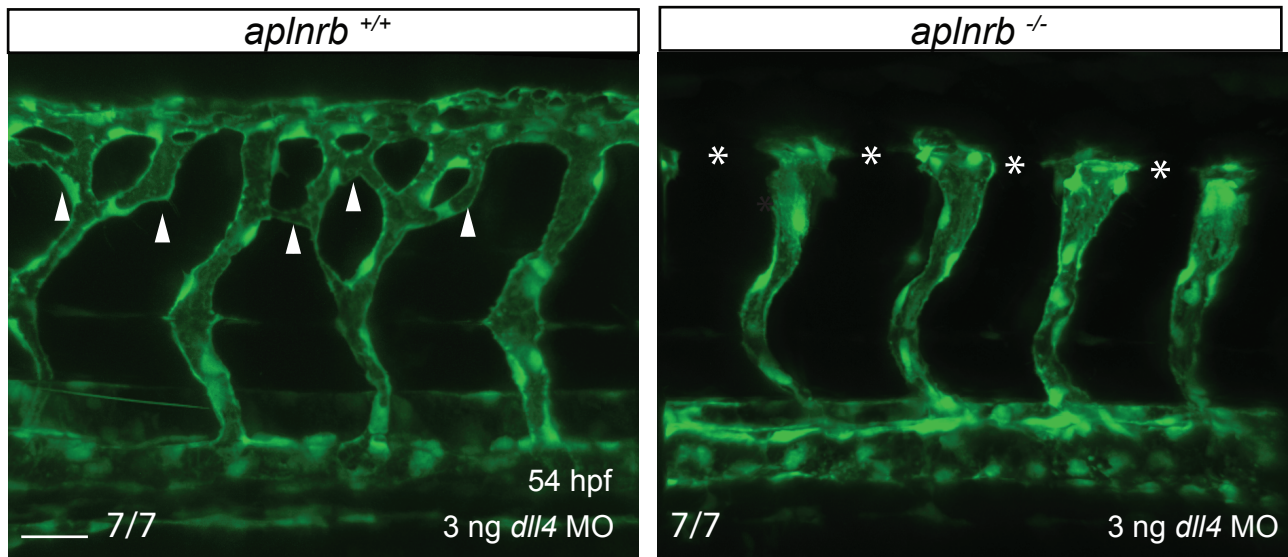

Supplement: supp [file elife-55589-supp-v1.zip › elife_poa_e55589_Figure_4_figure_supplement_1.pdf]
